# Supplementary material for: Adverse events caused by potential drug-drug interactions in an intensive care unit of a teaching hospital
Source: PubMed Central journal article supplement (PMC4738821; doi:10.5935/0103-507x.20150060), 2015
Supplement: rbti-27-04-0353-suppl01.pdf [file rbti-27-04-0353-suppl01.pdf]

## Adverse events caused by potential drug-drug interactions in an intensive care unit of a teaching hospital

*Eventos adversos por interações medicamentosas potenciais em unidade de terapia intensiva de um hospital de ensino*

Mariana Macedo Alvim<sup>1</sup>, Lidiane Ayres da Silva<sup>1</sup>, Isabel Cristina Gonçalves Leite<sup>1</sup>, Marcelo Silva Silvério<sup>1</sup>

**Table 1S** - Clinical values of the potential drug-drug interactions

| Severity        | Documentation |      |      |         |
|-----------------|---------------|------|------|---------|
|                 | Excellent     | Good | Fair | Unknown |
| Contraindicated | 1             | 1    | 1    | 5       |
| Important       | 1             | 1    | 1    | 5       |
| Moderate        | 2             | 2    | 2    | 5       |
| Secondary       | 3             | 3    | 4    | 5       |
| Unknown         | 5             | 5    | 5    | 5       |

Modified from: Tatro DS. Drug interaction facts. 2<sup>nd</sup> ed. St. Louis: Facts & Comparisons; 2013. Recommendations: 1 - avoid combinations; 2 - usually avoid combinations; 3 - minimize the risk; 4 - no action is required; 5 - no interaction.

**Table 2S** - Number of patients who have been prescribed antimicrobial drugs

| Most frequently prescribed antimicrobial drugs | Prescription<br>N (%) |
|------------------------------------------------|-----------------------|
| Meropenem                                      | 31 (38)               |
| Vancomycin                                     | 24 (29)               |
| Ceftriaxone                                    | 16 (20)               |
| Metronidazole                                  | 15 (18)               |
| Ciprofloxacin                                  | 14 (17)               |
| Cefepime                                       | 13 (16)               |
| Moxifloxacin                                   | 11 (13)               |
| Fluconazole                                    | 9 (11)                |
| Ampicillin + sulbactam                         | 8 (10)                |
| Amphotericin B                                 | 6 (7)                 |
| Piperacillin + tazobactam                      | 6 (7)                 |
| Sulfamethoxazole + trimethoprim                | 6 (7)                 |
| Teicoplanin                                    | 6 (7)                 |
| Metronidazole                                  | 5 (6)                 |
| Amikacin                                       | 4 (5)                 |
| Azithromycin                                   | 4 (5)                 |
| Cefazolin                                      | 4 (5)                 |
| Clindamycin                                    | 4 (5)                 |
| Polymyxin B                                    | 4 (5)                 |
| Amoxicillin + clavulanate                      | 3 (4)                 |
| Ceftazidime                                    | 3 (4)                 |
| Others                                         | 18 (22)               |

**Table 3S** - Use of antimicrobial drugs expressed in defined daily doses per 100 patient-days

| Antimicrobial drugs             | DDD per 100 patient-days |
|---------------------------------|--------------------------|
| Cefepime                        | 24.01                    |
| Meropenem                       | 21.95                    |
| Sulfamethoxazole + trimethoprim | 12.64                    |
| Ciprofloxacin                   | 12.47                    |
| Amphotericin B                  | 12.31                    |
| Vancomycin                      | 12.19                    |
| Ampicillin + sulbactam          | 10.26                    |
| Metronidazole                   | 9.86                     |
| Ceftriaxone                     | 9.76                     |
| Fluconazole                     | 7.73                     |
| Ampicillin                      | 7.35                     |
| Moxifloxacin                    | 6.46                     |
| Teicoplanin                     | 3.55                     |
| Piperacillin + tazobactam       | 3.29                     |
| Polymyxin B                     | 3.12                     |
| Clindamycin                     | 2.53                     |
| Amikacin                        | 2.17                     |
| Azithromycin                    | 2.11                     |
| Tenofovir                       | 1.40                     |
| Oxacillin                       | 1.27                     |
| Ceftazidime                     | 1.20                     |
| Amoxicillin + clavulanate       | 1.14                     |
| Fosamprenavir                   | 1.08                     |
| Lamivudine                      | 1.08                     |
| Ganciclovir                     | 1.01                     |
| Cefazolin                       | 0.89                     |
| Norfloxacin                     | 0.51                     |
| Clarithromycin                  | 0.06                     |
| Ritonavir                       | 0.01                     |

DDD - defined daily doses.
